# Supplementary material for: FoxO1 Links Insulin Resistance to Proinflammatory Cytokine IL-1β Production in Macrophages
Source: PubMed Central journal article supplement — Diabetes. 2009 Aug 3;58(11):2624–33. doi: 10.2337/db09-0232 (PMC2768186; doi:10.2337/db09-0232), 2009-08-03

**Supplementary Fig. 1. Nucleotide sequence profiles of wild-type and mutant *IL-1 $\beta$*  promoters:** The IRE DNA motif was altered through two-base substitutions from T to C by site-directed mutagenesis using the primers 5'-CTTATAGAAACAAGAATTTTCCgAgACAATTTTTTAG-3' for forward and 5'-GGAAAATTCTTGTTTCTATAAGATCTGGGGA-3' for reverse reactions. The mutant IRE DNA was confirmed by DNA sequencing. The anti-sense strand nucleotide sequences of both wild-type and mutant IRE DNA are shown.

Supplemental Figure 1

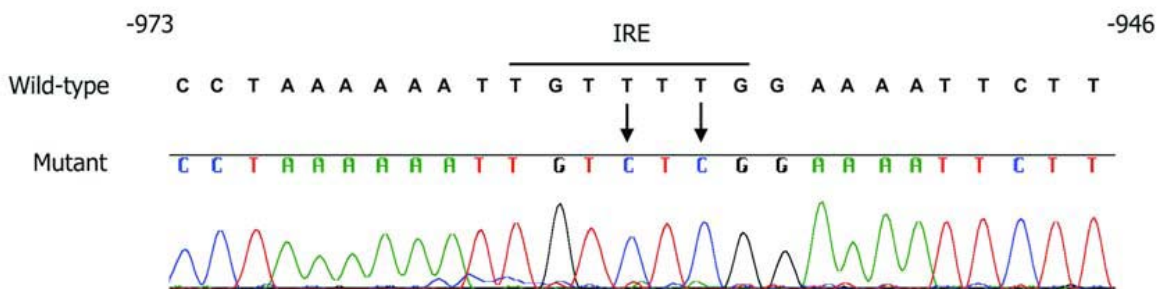

**Supplementary Fig. 2. Conservation of FoxO1 and NF $\kappa$ B target sites within the *IL-1 $\beta$*  promoter:** The promoter sequences of human, rat and mouse *IL-1 $\beta$*  genes were aligned for the comparison of the IRE and NF $\kappa$ B binding sites, as indicated in the nucleotide sequence underlined.

Supplemental Figure 2

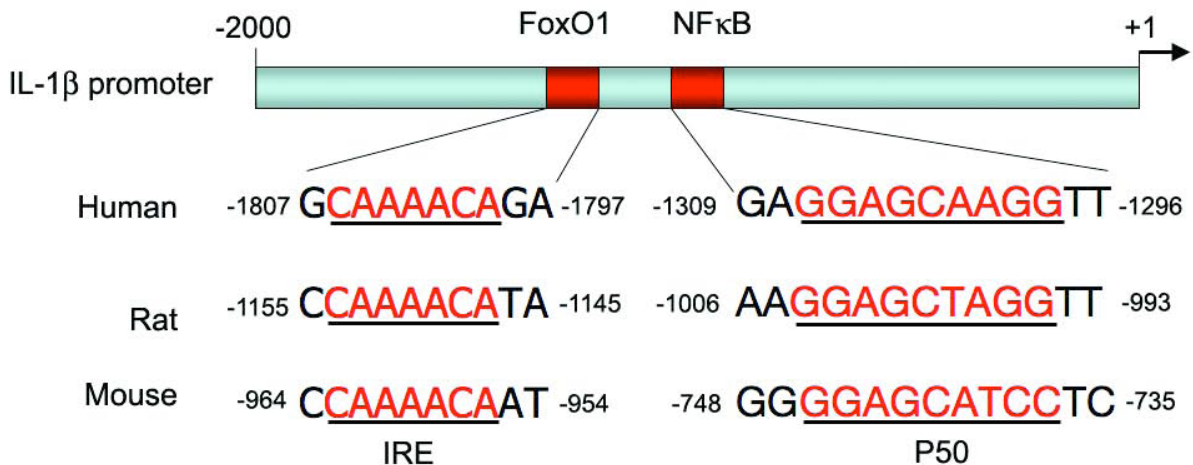

Supplement: supp_db09-0232_db0232_Online_Appendix_2-Figures.pdf [file supp_db09-0232_db0232_Online_Appendix_2-Figures.pdf]
